# Supplementary material
Source: PubMed Central journal article supplement (PMC8710187)
Supplement: NIHMS1719225-supplement-Appendix_E1_Methods.pdf [file NIHMS1719225-supplement-Appendix_E1_Methods.pdf]

## 1 **APPEEDIX E1. METHODS**

### 2 **Mouse Heart Tissue Collection**

3 Each mouse was anesthetized by inhaled isoflurane before heart harvest. A U-shape  
4 incision was made for cutting both skin and peritoneum that begins at navel area and  
5 extends up to front legs. Then the chest cavity was opened by making an incision in the  
6 diaphragm and cutting the rib cage on both sides. The heart was harvested by gently  
7 lifting at the apex and cutting the great vessels. The excised heart was immediately  
8 placed into cold (4°C) Krebs buffer (119 NaCl, 25 NaHCO<sub>3</sub>, 4.6 KCl, 1.2 KH<sub>2</sub>PO<sub>4</sub>, 1.2  
9 MgSO<sub>4</sub>, 1.8 CaCl<sub>2</sub>, 11 glucose, in mM, pH 7.4) for microvessel study or cold cell culture  
10 medium for cell isolation, respectively. The experimental protocols/groups are  
11 summarized in the Figure E1.

12

### 13 **Microvessel Dissection and Stabilization**

14 The distal portion of left anterior descending artery (100-150 μm in diameter) was  
15 dissected from the isolated mouse heart as previously described.<sup>E1</sup> Then, the  
16 microvessel was cannulated with 2 glass micropipettes and pressurized in a no-flow  
17 state in a microvessel organ chamber containing aerated (95% O<sub>2</sub>, 5% CO<sub>2</sub>) Krebs  
18 buffer solution, and maintained at 37°C. After a 60-minute stabilization period in the  
19 chamber, we studied the pathophysiological change by H/R injury stimulation.

20

### 21 **CP-H/R Model of Endothelial Cells**

22 Mouse heart endothelial cells (MHECs) isolated from the harvested heart were cultured  
23 in EGM-2 MV medium (Lonza Biosciences, Alpharetta, GA). For developing CP-H/R  
24 model, MHECs were placed in the sealed chamber, filled by high-concentration of  
25 nitrogen (95% N<sub>2</sub> +5%CO<sub>2</sub>) for 3 hours, and then re-oxygenated 2 hours by transferring

26 cells into the normoxic culture incubator. Mito-Tempo (10 $\mu$ M) was added to the culture  
27 medium 30 minutes before H/R.<sup>E1</sup>

28

### 29 **Measurement of Intracellular Calcium**

30 Endothelial cells were loaded with 1 $\mu$ M Rhod-2 (Thermo Fisher Scientific) for 30  
31 minutes by incubation in bath solution containing 5 KCl, 140 NaCl, 2 MgCl<sub>2</sub>, 1 CaCl<sub>2</sub>,  
32 10 HEPES, 30 glucose (in mM). Rhod-2 AM was excited using a 545 nm laser and the  
33 fluorescence emission was collected at 578 nm wavelengths. Rhod-2 fluorescence  
34 signal was converted to intracellular Ca<sup>2+</sup> concentration using the following equation:

35  $[Ca^{2+}]_i = Kd(F - F_{min}) / (F_{max} - F)$ , where Kd Rhod-2=1.58 $\mu$ M and  $F_{min} = F_{max} / 15$ .<sup>E2,E3</sup>  $F_{max}$

36 was determined by adding 100 $\mu$ M Rhod-2 to the 1 mM Ca<sup>2+</sup> bath solution and  
37 measuring the Rhod-2 fluorescence. The fluorescence quantification was obtained  
38 using ImageJ (National Institutes of Health) software.

39

### 40 **Electrophysiological Study of Endothelial Cell K<sup>+</sup> Currents**

41 the patch clamp recording system are depicted in the Figure E2. Patch clamp recording  
42 techniques were used to measure K<sup>+</sup> currents in the whole cell patch-clamp  
43 configurations, as described in detail previously.<sup>E1</sup> The primarily cultured MHECs  
44 were washed twice with Ca<sup>2+</sup>-free DMEM. Whole cell K<sup>+</sup> currents were recorded with  
45 Axon Axopatch-200B amplifier, Axon Digidata 1550B A/D converter and pClamp 11  
46 software (all by Molecular Devices, Foster City, CA) in the voltage-clamp mode. The  
47 bath solution containing 5 KCl, 140 NaCl, 2 MgCl<sub>2</sub>, 1 CaCl<sub>2</sub>, 10 HEPES, 30 glucose  
48 (in mM, pH 7.4, 22°C). The patch pipette (1-3 M $\Omega$ ) was filled with the pipette solution  
49 containing 20 KCl, 8 NaCl, 110 K-Aspartate, 8.5 CaCl<sub>2</sub>, 1 MgCl<sub>2</sub>, 10 HEPES, 0.01

50 Niflumic acid and 10 BAPTA (in mM, pH 7.2, with calculated free  $\text{Ca}^{2+}$  400 nmol/L).  
51 For  $\text{Ca}^{2+}$  free (low  $\text{Ca}^{2+}$  group) pipette solution, no  $\text{CaCl}_2$  was added. For high  $\text{Ca}^{2+}$   
52 (2 $\mu\text{M}$ ) pipette solution, 9.7mM  $\text{CaCl}_2$  was added. The free  $\text{Ca}^{2+}$  concentration was  
53 calculated by using Maxchelator as described previously in detail.<sup>E4</sup>

54

55 Current voltage recording conditions for  $\text{K}^+$  currents were achieved by stepping in 20  
56 mV increments from a holding potential -50 mV by 150 ms test pulses in the range  
57 between -100 to +100 mV.  $\text{K}^+$  currents were expressed as current density (current  
58 divided by cell membrane capacitance). Low-pass filter frequency was 2 kHz and  
59 sampling rate was 10 kHz. Current time recording conditions for  $\text{K}^+$  currents were  
60 obtained by holding potential at +100 mV. The selective SK activator NS309 on the  
61 whole cell  $\text{K}^+$  currents were examined, and then both SK2/SK3 blocker apamin ( $10^{-7}\text{M}$ )  
62 and the SK4(IK) blocker TRAM34 ( $10^{-6}\text{M}$ ) were applied for testing the specificity of  
63 SK channel activation.<sup>E1, E5, E6</sup>

64

## 65 **Western Blotting**

66 The methods for whole-cell protein purification, Western blotting, and imaging  
67 quantification have been described previously.<sup>E1, E5, E6</sup> Membranes were incubated  
68 overnight at 4°C with primary antibodies against SK3 and SK4 (Alomone Labs,  
69 Jerusalem, Israel). After washing with TBST, membranes were incubated with  
70 secondary antibody conjugated to horseradish peroxidase. All membranes were also  
71 incubated with glyceraldehyde-3-phosphate dehydrogenase (Cell Signaling Technology,  
72 Danvers, MA) as loading controls.

73

74 **Measurement of Mitochondrial Reactive Oxygen Species**

75 MHECs were stained with 5  $\mu$ M MitoSox<sup>TM</sup> Red and 100 nM MitoTracker Green FM  
76 (Invitrogen, Waltham, MA) according to the manufacture's protocol and previously  
77 studied.<sup>E6</sup> Then cells were counter stained with 5 $\mu$ g/ml Hoechst 33342 for 10 minutes.  
78 Images were taken on a Zeiss LSM710 confocal microscope (Carl Zeiss GmbH,  
79 Germany). The mean values of the whole cell fluorescence of MitoSOX<sup>TM</sup> Red were  
80 obtained with Image J software.<sup>E6</sup>

81

82 **RESULTS**

83 **Characteristics of DM and ND Mice.**

84 The age, body weight and blood glucose levels of nondiabetic (ND) and diabetic (DM)  
85 mice are summarized in Figure E3.

86

87 **Dose-and Endothelium-dependent Relaxation Responses to NS309 and ADP in the**  
88 **Mouse Small Coronary Arteries**

89 Following CP-H/R, the endothelium-dependent relaxation responses of mouse diabetic  
90 vessels to NS309 (Figure E4A) and ADP (Figure E4B) were significantly decreased  
91 compared with that of non-diabetic mice in a dose-dependent fashion. Treatment with  
92 MT (10 $\mu$ M) improved the recovery of endothelium-dependent relaxation responses to  
93 the SK activator NS309 and ADP in DM and ND mice.

94

95 **Dose-and Endothelium-independent Relaxation Responses to SNP in the Mouse**  
96 **Small Coronary Arteries**

97 There were no significant differences in the dose-and endothelium-independent  
98 relaxation responses to SNP following CP-H/R between ND and DM groups. There  
99 were no significant changes in the dose-dependent relaxation response to SNP after MT  
100 (10 $\mu$ M) treatment between ND and DM groups (Figure E4C).

101

### 102 **MT (10 $\mu$ M) Enhanced SK Channel Currents of MHECs in H/R Model from ND** 103 **and DM Mice**

104 Administration of NS309 significantly increased the total K<sup>+</sup> currents of MHECs in  
105 H/R model both types of cell/treatment from ND and DM mice ( $P=0.071$ , and  $P=0.0494$ ,  
106 Figure E5A, C), which also seen in ND and DM treatment with MT (10 $\mu$ M) groups  
107 ( $P=0.0027$ , and  $P<0.0001$ , Figure E5B, D). Subsequent application of apamin (10<sup>-7</sup>M)  
108 and TRAM34(10<sup>-6</sup>M) abolished NS309-induced effects on K<sup>+</sup> currents in both  
109 cell/treatment types.

110

### 111 **E-REFERENCES**

112 E1. Zhang Z, Shi G, Liu Y, Xing H, Kabakov AY, Zhao AS et al. Coronary endothelial  
113 dysfunction prevented by small-conductance calcium-activated potassium channel  
114 activator in mice and patients with diabetes. *J Thorac Cardiovasc Surg.* 2020;  
115 160(6):e263-e280.

116

117 E2. Escobar AL, Velez P, Kim AM, Cifuentes F, Fill M, Vergara JL. Kinetic properties  
118 of DM-nitrophen and calcium indicators: rapid transient response to flash photolysis.  
119 *Pflugers Arch.* 1997;434:615-31.

120

121 E3. Trafford AW, Diaz ME, O'Neill SC and Eisner DA. Comparison of subsarcolemmal  
122 and bulk calcium concentration during spontaneous calcium release in rat ventricular  
123 myocytes. *J Physiol.* 1995;488 ( Pt 3):577-86.

124

125 E4. Bers DM, Patton CW and Nuccitelli R. A practical guide to the preparation of Ca(2+)  
126 buffers. *Methods Cell Biol.* 2010;99:1-26.

127

128 E5. Liu Y, Xie A, Singh AK, Ehsan A, Choudhary G, Dudley S, et al. Inactivation of  
129 Endothelial Small/Intermediate Conductance of Calcium Activated Potassium

130 Channels Contributes to Coronary Arteriolar Dysfunction in Diabetic Patients. *J Am*  
131 *Heart Assoc.* 2015;4:e002062.  
132  
133 E6. Liu Y, Kabakov AY, Xie A, Shi G, Singh AK, Sodha NR, et al. Metabolic regulation  
134 of endothelial SK channels and human coronary microvascular function. *Int J Cardiol.*  
135 2020;312:1-9.
